# Supplementary material for: Cellulose-derived carbon bearing –Cl and –SO3H groups as a highly selective catalyst for the hydrolysis of cellulose to glucose
Source: Royal Society of Chemistry journal article supplement (doi:10.1039/c4ra05520a), 2014-08-05
Supplement: c4ra05520a1.pdf [file c4ra05520a1.pdf]

Supporting information for:

**Cellulose-derived carbon bearing -Cl and -SO<sub>3</sub>H groups as a highly selective catalyst for hydrolysis of cellulose to glucose**

by

Qi Pang, Liqing Wang, Hui Yang, Lishan Jia,\* Xinwei Pan and Chenchao Qiu

Department of Chemical and Biochemical Engineering, College of Chemistry and Chemical Engineering, Xiamen University, Xiamen 361005, Fujian, China.

\*Tel: 086-592-2188283. Fax: 086-592-2184822. E-mail: jials@xmu.edu.cn.

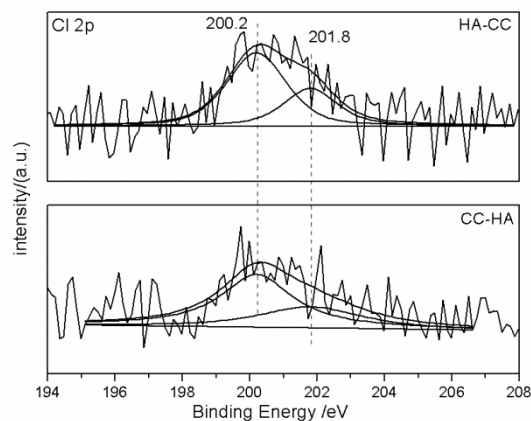

**Fig.S1** The XPS Cl 2p spectra of HA-CC and CC-HA.

**Table S1** BET results of catalysts.

| Sample                  | BET surface area<br>(m <sup>2</sup> /g) | Total pore volume<br>(cm <sup>3</sup> /g) | Average pore radius<br>(nm) |
|-------------------------|-----------------------------------------|-------------------------------------------|-----------------------------|
| HA-CC-SO <sub>3</sub> H | 47                                      | 0.044                                     | 1.02                        |
| CC-HA-SO <sub>3</sub> H | 15.3                                    | 0.014                                     | 1.76                        |

**Table S2** XPS analysis results of catalysts.

| Sample                  | Surface atomic concentration (%) |       |      |      |
|-------------------------|----------------------------------|-------|------|------|
|                         | C                                | O     | Cl   | S    |
| HA-CC-SO <sub>3</sub> H | 88.15                            | 11.44 | 0.14 | 0.27 |
| CC-HA-SO <sub>3</sub> H | 72.96                            | 25.77 | 0.01 | 1.26 |
